# Supplementary material
Source: PubMed Central journal article supplement (PMC5153539)
Supplement: mmc2.pdf [file mmc2.pdf]

# Polar Localization of the Serine Chemoreceptor of *Escherichia coli* Is Nucleoid Exclusion-Dependent

Ramakanth Neeli-Venkata,<sup>1</sup> Sofia Startceva,<sup>1</sup> Teppo Annala,<sup>1</sup> and Andre S. Ribeiro<sup>1,\*</sup>

<sup>1</sup>Laboratory of Biosystem Dynamics, Department of Signal Processing, Tampere University of Technology, Tampere, Finland

**ABSTRACT** We studied whether nucleoid exclusion contributes to the segregation and retention of Tsr chemoreceptor clusters at the cell poles. Using live time-lapse, single-cell microscopy measurements, we show that the single-cell spatial distributions of Tsr clusters have heterogeneities and asymmetries that are consistent with nucleoid exclusion and cannot be explained by the diffusion-and-capture mechanism supported by Tol-Pal complexes at the poles. Also, in cells subjected to ampicillin, which enhances relative nucleoid lengths, Tsr clusters locate relatively closer to the cell extremities, whereas in anucleated cells (deletion mutants for mukB), the Tsr clusters are closer to midcell. In addition, we find that the fraction of Tsr clusters at the poles is smaller in deletion mutants for Tol-Pal than in wild-type cells, although it is still larger than would be expected by chance. Also in deletion mutants, the distribution of Tsr clusters differs widely between cells with relatively small and large nucleoids, in a manner consistent with nucleoid exclusion from midcell. This comparison further showed that diffusion-and-capture by Tol-Pal complexes and nucleoid exclusion from the midcell have complementary effects. Subsequently, we subjected deletion mutants to suboptimal temperatures that are known to enhance cytoplasm viscosity, which hampers nucleoid exclusion effects. As the temperature was lowered, the fraction of clusters at the poles decreased linearly. Finally, a stochastic model including nucleoid exclusion at midcell and diffusion-and-capture due to Tol-Pal at the poles is shown to exhibit a cluster dynamics that is consistent with the empirical data. We conclude that nucleoid exclusion also contributes to the preference of Tsr clusters for polar localization.

## INTRODUCTION

*Escherichia coli* chemoreceptor proteins perform multiple tasks, including assessing chemical gradients (1), thermosensing (2), and aerotaxis (3). These proteins are organized in trimer-of-dimers that form large clusters whose structure is further stabilized by the adaptor protein CheW and the histidine kinase CheA (1,4,5). The purpose of clustering is likely signal-processing enhancement of the receptor system (6–9). The clustering process is robust, as receptors can assemble via their cytoplasmic domains even in the absence of some chemotaxis-associated proteins, such as CheW (10). Most studies agree that cluster formation occurs via an energy-free, self-assembly process known as stochastic nucleation (11–14).

Chemotaxis-associated clusters preferentially locate at the cell poles (15–17), but the means by which this occurs remain unclear, given the lack of evidence for active transport mechanisms. Studies have suggested various mechanisms by which this may occur. For example, it has been

suggested that the clusters first form at midcell and then attach to the cell membranes, and are dragged to the poles by cell growth after a few rounds of cell division (11,12). It has also been suggested that the clusters diffuse freely in the cell membranes and that polar accumulation is caused by the curved shape of the poles and the ability of the clusters to match this curvature (7,18).

Recent studies suggested that instead a diffusion-and-capture process (19) is responsible for the spatial distribution of this and several other polar proteins (20–23). One study in particular (24) identified the trans-envelope Tol-Pal complex, a widely conserved component of the cell envelope of Gram-negative bacteria (25), as being responsible for capturing the clusters at the poles, since in deletion mutants for Tol-Pal this process is impaired. The existence of a diffusion-and-capture mechanism is further supported by the observation that a fairly constant fraction (~7%) of Tsr proteins exhibit free diffusion over the entire cell surface at any given time (26).

Tsr, one of the methyl-accepting chemoreceptor proteins of the *E. coli* chemotaxis system (2), is a serine chemotaxis receptor protein that preferentially forms heterotrimeric membrane complexes at the poles. The mobility of Tsr

Submitted June 6, 2016, and accepted for publication October 19, 2016.

\*Correspondence: [andre.ribeiro@tut.fi](mailto:andre.ribeiro@tut.fi)

Editor: Zemer Gitai.

<http://dx.doi.org/10.1016/j.bpj.2016.10.024>

© 2016 Biophysical Society.

labeled with fluorescent Venus proteins was recently investigated and found to be similar to that of the natural system (26). These proteins can diffuse over the entire cell surface but usually exhibit restricted diffusion, particularly at the poles, where they appear to move freely except for being restricted to the same pole for several generations (12). When the cytoskeletal protein MreB is disrupted and the cell becomes rounded, Tsr clusters at the poles tend to fragment and the fraction of mobile Tsr increases (26). This suggests that, aside from the diffusion-and-capture process made possible by Tol-Pal complexes (24), one or more additional mechanisms may contribute to the preference of the chemoreceptor clusters for a polar location.

In *E. coli*, the nucleoid is usually at midcell and confined within the cell cylinder. Among other components, it contains most of the DNA, RNA, and nucleoid-associated proteins of the cell. Major nucleoid-associated proteins include H-NS, HU, Fis, IHF, and StpA. The dimeric histone-like protein HU in particular is highly abundant and involved in DNA compaction, and thus can be used to assess the nucleoid's morphology and positioning in vivo when fused with fluorescent proteins such as mCherry (27). The partitioning of replicated nucleoids in cell division involves the structural maintenance of chromosome complex MukBEF (28). The deletion of mukB causes a temperature-sensitive lethal phenotype that fails to partition the chromosome, resulting in the formation of anucleate cells.

Recent studies have reported that in addition to Tsr clusters, other types of large biomolecules in *E. coli* are segregated to and then retained at the poles. This is due to an energy-free volume exclusion caused by the presence of the nucleoid at midcell (29,30) that affects plasmids (31,32) and other large complexes (33,34). A possible contribution of nucleoid exclusion to the distribution of chemoreceptor clusters associated with chemotaxis has not yet been considered.

Here, we explored whether nucleoid exclusion contributes to the segregation and retention of Tsr chemoreceptor clusters at the cell poles. In addition, we evaluated the contribution from other, previously proposed mechanisms, namely, Tol-Pal diffusion-and-capture and dragging by cell elongation. We used *E. coli* cells expressing Tsr-Venus and harboring a plasmid that expresses the nucleoid-tagging protein HupA-mCherry, and performed live single-cell studies of the spatiotemporal distribution of Tsr clusters and nucleoids. The Venus protein is a YFP variant that is derived from GFP and has a fast maturation time (35) that allows real-time imaging by fluorescence microscopy. The tagging of Tsr with Venus does not affect its spatial distribution and is not toxic to cells (35). Measurements were conducted in wild-type (WT) and isogenic mutant cells lacking the Tol-Pal complex ( $\Delta tolpal$ ). We further studied the Tsr cluster spatial distribution in anucleoid cells ( $\Delta mukB$ ). Finally, we performed stochastic simulations of dynamic models and compared the long-term behaviors of the clus-

ters, as indicated by in silico and in vivo data, to assess whether the proposed volume-exclusion mechanism could explain the empirical observations.

## MATERIALS AND METHODS

### Chemicals

For routine cultures, M9-glucose media components, isopropyl  $\beta$ -D-1-thiogalactopyranoside (IPTG), 4',6-diamidino-2-phenylindole (DAPI), formaldehyde, agarose for microscopic slide gel preparation, and antibiotics were purchased from Sigma-Aldrich (St. Louis, MO). Amino acids and vitamins were purchased from GIBCO/BRL (Grand Island, NY). SYTOX Orange and a Live/Dead BacLight Viability Kit (L7007) were purchased from Thermo Fisher Scientific/Molecular Probes (Waltham, MA).

### Strains and plasmids

We used *E. coli* strain (SX4) expressing the chimeric gene *tsr-venus* under the control of the  $P_{lac}$  promoter, which is incorporated into the chromosome (35) (a kind gift from Sunny Xie, Harvard University). We transformed this strain with a pBR322 derivative plasmid expressing HupA-mCherry (a nucleoid-tagging protein) under the control of a constitutive promoter with ampicillin resistance (36) (a kind gift from Nancy Kleckner, Harvard University). The host *E. coli* K-12 strain has a genotype of (*lacI*p4000 *hsdR*514 DE(*ara*BAD)567 DE(*rha*BAD)568 rph-1).

We also used *E. coli* strain MG1655 and its isogenic derivative strain lacking Tol-Pal components (MG1655  $\Delta tolpal$ ) (27) (a kind gift from Douglas Weibel, University of Wisconsin-Madison). These were transformed with a pBR322 derivative plasmid expressing the gene *tsr-venus* under the control of the  $P_{lac}$  promoter. The *E. coli* strain MG1655 has a genotype of ( $F^- \lambda^-$  rph-1). The SX4 and MG1655 strains served as the WT for our studies.

The mutant strain AZ5372 lacking mukB (*trpC9941*  $\Delta mukB::kan$ ), referred to as  $\Delta mukB$ , was obtained from the Keio single-gene knockout collection (36) and transformed with a pBR322 derivative plasmid expressing the gene *tsr-venus* under the control of the  $P_{lac}$  promoter.

All overnight liquid cultures were grown in M9-glucose medium for 14 h at 37°C with shaking (250 rpm), except for  $\Delta mukB$ , which was incubated at 22°C. The M9-glucose (0.4%) medium was supplemented with amino acids and vitamins, along with kanamycin ( $35 \mu\text{g mL}^{-1}$ ) and ampicillin ( $50 \mu\text{g mL}^{-1}$ ).

We subsequently made subcultures by diluting the overnight culture into fresh M9 glucose medium containing the appropriate antibiotics. We opted for M9-glucose medium to maintain a well-defined cell culture condition and achieve low cellular autofluorescence. In addition, previous studies have shown that cells have a higher propensity to form arrays in minimal media than in richer media such as Terrific broth and Luria broth, suggesting that the arrays' functionality is enhanced (18).

### Induction of production of Tsr-Venus

Strains from overnight cultures were diluted into fresh media with the appropriate antibiotics (as described above) at an initial  $OD_{600}$  of 0.02 and grown until they reached an  $OD_{600}$  of  $\sim 0.3$ , at 37°C with shaking (250 rpm). In the SX4 strain, Tsr-Venus production, controlled by  $P_{lac}$ , was induced by IPTG at the appropriate concentrations. In the MG1655 strain and its derivative, containing the plasmid expressing Tsr-Venus, induction was performed with final concentrations of  $50 \mu\text{M mL}^{-1}$  IPTG for 1 h at 37°C. In both cases, cells were then left in the shaker to grow until they reached an  $OD_{600}$  of  $\sim 0.45$ – $0.5$  before microscopy was performed. In addition to microscopy, we also measured Tsr-Venus expression as a

function of induction with a microplate fluorometer at 37°C (Fig. S3 in the Supporting Material).

## Nucleoid visualization by HupA-mCherry tagging

To observe Tsr-Venus clusters and nucleoids in individual cells simultaneously over time, we used cells containing the plasmid from which HupA-mCherry is constitutively expressed (SX4-HupA-mCherry strain). These were induced with 200  $\mu\text{M mL}^{-1}$  IPTG for 1 h at 37°C and then centrifuged, and the supernatant discarded. Then, 4  $\mu\text{L}$  of cells was placed on a 1% agarose gel pad prepared in M9-glucose medium for image acquisition.

## Nucleoid visualization by DAPI and SYTOX Orange staining

DAPI stains nucleoids specifically with little or no cytoplasmic labeling. Cells at an  $\text{OD}_{600}$  of  $\sim 0.3$  were induced with 200  $\mu\text{M mL}^{-1}$  IPTG (SX4 strain) or 50  $\mu\text{M mL}^{-1}$  IPTG (MG1655 and MG1655  $\Delta\text{tolpal}$  strain) and left in the shaker incubator at 37°C until they reached an  $\text{OD}_{600}$  of  $\sim 0.5$ . The cells were then fixed with 3.7% formaldehyde in phosphate-buffered saline (PBS) for 30 min and washed with PBS to remove excess formaldehyde. The pellets were suspended in PBS, and DAPI (2  $\mu\text{g mL}^{-1}$ ) was added to this suspension (37). After incubation for 20 min in the dark, the cells were centrifuged and washed twice with PBS to remove excess DAPI. The cells were then resuspended in PBS and 8  $\mu\text{L}$  of these samples was placed on a 1% agarose gel pad prepared in M9-glucose medium for microscopy observation.

To observe the nucleoids of  $\Delta\text{mukB}$  cells, we used SYTOX Orange dye instead of DAPI, since we found that DAPI staining does not allow one to distinguish easily between cells with and without nucleoid, due to strong background autofluorescence and image blurring (38).  $\Delta\text{mukB}$  cells containing the plasmid expressing Tsr-Venus were grown overnight in Luria broth medium at 22°C. Subsequently, they were subcultured and allowed to grow exponentially in M9-glucose medium at 22°C, followed by activation of Tsr-Venus (to a final concentration of 50  $\mu\text{M mL}^{-1}$  IPTG) for 1 h at 37°C. To this culture, a SYTOX Orange solution (50  $\mu\text{M}$  stock concentration) was added to a final concentration of 500 nM and incubated for 10 min in the dark (38). The cells were then centrifuged twice and resuspended in fresh M9-glucose medium, and 8  $\mu\text{L}$  of these samples was placed on a 1% agarose gel pad prepared in M9-glucose medium along with inducer IPTG for microscopy observation in a temperature-controlled chamber (see the “Microscopy” section below).

## Measurements with ampicillin

For measurements with ampicillin, we used SX4 cells (35). Cells were grown as described in the previous section. Next, the cells were induced with IPTG (200  $\mu\text{M}$ ) to activate Tsr-Venus expression. Simultaneously, we introduced freshly prepared ampicillin (100  $\mu\text{g mL}^{-1}$ ) in the media and left the cells in the incubator for 30 min. The nucleoid was observed by DAPI staining.

To assess the proportion of viable cells after ampicillin treatment, we performed live/dead staining according to the protocol for the Live/Dead BacLight Viability Kit. Equal volumes of SYTO 9 (reagent A) and propidium iodide (PI; reagent B) from the kit were mixed and added to the cells suspended in 0.85% (w/v) NaCl (3  $\mu\text{L mL}^{-1}$  of cells). After mixing and incubation at room temperature in the dark for 15 min, the cells were visualized by epifluorescence microscopy with the standard fluorescent long-pass filter set for simultaneous visualization of live and dead cells. The green fluorescent dye SYTO 9 permeates both intact and damaged cell membranes, whereas red PI only enters cells with significant membrane damage (39). Thus, upon ampicillin treatment, cells with damaged mem-

branes take up the red PI dye, which saturates the green SYTO 9 dye that is taken up by all cells. The presence of red color is therefore indicative of cell death, and green indicates live cells.

## Measurements at suboptimal temperatures

Tol-Pal deletion mutant cells (MG1655  $\Delta\text{tolpal}$ ) with a Tsr-Venus-expressing plasmid were grown as described above. Tsr-Venus expression was induced by adding 50  $\mu\text{M mL}^{-1}$  of IPTG to the culture. The cells were then left in the incubator at the appropriate temperatures (10°C, 15°C, and 24°C) for 1 h and fixed with 3.7% formaldehyde, followed by DAPI staining and microscopy image acquisition.

## Microscopy

We performed single-time-point imaging of cells with Tsr-Venus and DAPI (or) SYTOX Orange-stained nucleoids (SX4, MG1655, and MG1655  $\Delta\text{tolpal}$  and  $\Delta\text{mukB}$  strains), and time-lapse imaging of cells with Tsr-Venus and HupA-mCherry-tagged nucleoids (SX4-HupA-mCherry strain). With both imaging methods, phase-contrast images were acquired for cell segmentation and, in time series, for lineage construction.

In single-time-point microscopy, Tsr-Venus was induced by adding 200  $\mu\text{M mL}^{-1}$  IPTG (SX4 strain) or 50  $\mu\text{M mL}^{-1}$  IPTG (MG1655, MG1655  $\Delta\text{tolpal}$  and  $\Delta\text{mukB}$  strains) to the liquid culture. The cells were then left in the shaker incubator at 37°C for 1 h before image acquisition. For this purpose, 8  $\mu\text{L}$  of cells was placed on a 1% agarose gel pad prepared in M9-glucose medium. Images were taken after the cells were placed under observation.

For time-lapse microscopy measurements, noninduced cells (SX4 strain) were placed on a microscope slide between a coverslip and M9-glucose agarose gel pad containing IPTG (200  $\mu\text{M mL}^{-1}$ ). During image acquisition, the cells were constantly supplied with fresh media containing IPTG, at the same concentration, by a microperfusion peristaltic pump (Bioptechs, Butler, PA) at 1  $\text{mL min}^{-1}$ . Images were captured every 3 min for 1 h by confocal microscopy.

Imaging was performed using a Nikon Eclipse inverted microscope (Ti-E, Nikon, Tokyo, Japan) with a C2+ point scanning confocal system and a 100 $\times$  Apo total internal reflection fluorescence objective (1.49 NA, oil). For population imaging, Tsr-Venus fluorescence was measured using a 488 nm argon laser (Melles-Griot, Rochester, NY) and HQ514/30 filter. HupA-mCherry fluorescence was measured using a 543 nm He-Ne laser (Melles-Griot) and HQ585/65 filter (Nikon). For time-lapse microscopy measurements of Tsr-Venus- and mCherry-tagged nucleoid(s) (SX4-HupA-mCherry strain), we performed highly inclined and laminated optical sheet microscopy (40) using an EMCCD camera (iXon3 897, Andor Technology, Belfast, UK) and the same lasers, along with an HQ515/30 filter and Texas Red filter (Nikon). DAPI-stained nucleoids were observed by epifluorescence microscopy using a mercury lamp with a DAPI filter (Nikon), and SYTOX Orange-stained nucleoids were observed with the EMCCD camera. SYTOX Orange was visualized using 543-nm laser excitation and a Texas Red filter (Nikon). Phase-contrast images were captured simultaneously by a CCD color camera (DS-Fi2, Nikon). Finally, for the Live/Dead BacLight viability assay, we used the CCD color camera and an LF488/LP-B-NTE filter cube (Semrock, Rochester, NY) for simultaneous visualization of SYTO 9- and PI-stained cells.

Images were acquired with the use of NIS-Elements software (Nikon). Slides were kept in a temperature-controlled chamber (FCS2, Bioptechs) at a stable temperature (37°C unless stated otherwise).

## Image analysis

The image analysis procedure included cell segmentation, lineage construction, detection and characterization of fluorescent spots (Tsr clusters) and

nucleoids, and characterization of the spatial distributions of clusters and nucleoids. The various steps were performed using custom-made software that integrates components from the software MAMLE (41) and CellAging (42), along with the cluster-detection method proposed in (43).

Cell segmentation was performed from phase-contrast images by MAMLE (41), followed by manual correction. Next, confocal images were aligned to the phase-contrast images as described in (44). Lineage construction, when needed, was automatically performed by CellAging (42) and then manually corrected. Detection and characterization of the size and intensity of fluorescent Tsr clusters were performed as described in (43), by defining a cluster as a connected component, with each pixel having a light intensity above a threshold. For this purpose, we assume that the background pixel intensities follow a Gaussian distribution with the same median and upper quartile as the pixels in the cell. The threshold is selected by visual inspection of the outcome. From the segmented image, the number of clusters is calculated. The area of each cluster is calculated by counting the number of pixels within.

For nucleoids, we used the same method as described above. For each cell, we determined the fluorescence levels along the major cell axis of a background-corrected cell and summed the fluorescence intensities along the minor axis. For a given cell population, we normalized the cell lengths and averaged the fluorescence intensities over all cells. This method is used for images of DAPI-stained and HupA-mCherry-tagged nucleoids. To detect the boundaries of the nucleoid in each cell, we fitted a piecewise constant probability density function with three pieces to its fluorescence intensity distribution along the major cell axis by maximum likelihood. Given the two separation points obtained from the fit, we determined the center of the nucleoid as the middle point between them.

To examine Tsr-Venus spatial distributions, we first obtained background-corrected cells by subtracting the median cell intensity from each cell pixel intensity, and summed the fluorescence intensities along the minor axis. Finally, to distinguish between midcell and poles, we defined a boundary at 0.5 (with 0 being midcell and 1 being the cell extreme) as in (24). The overall image-analysis procedure is illustrated in Fig. S1.

## Stochastic modeling

We implemented stochastic models of the two mechanisms responsible for the preference for a polar localization of the Tsr clusters considered here (diffusion-and-capture by Tol-Pal complexes at the poles and nucleoid exclusion from midcell; see Fig. S2). The dynamics of the models was driven by the stochastic chemical kinetics simulator SGNS2 (45), which can implement transient compartments. We used this feature to model, among other things, the diffusion-and-capture mechanism and the volume-exclusion mechanism caused by the nucleoid. It also allowed us to obtain a spatial location for each cluster in the cell (via cell compartmentalization into blocks).

The models are two-dimensional and were used to compare the dynamics of the Tsr clusters in the presence of relatively small and large nucleoids, and in the presence and absence of Tol-Pal. A description of the models, reactions, and parameters is provided in Supporting Materials and Methods.

## RESULTS

To visualize chemoreceptors *in vivo*, we used 1) the SX4 strain with a chimeric *tsr-venus* gene inserted into the chromosome (35), 2) the MG1655 strain (WT and deletion mutant for Tol-Pal,  $\Delta\text{tolpal}$ ), and 3) the *mukB* deletion mutant strain ( $\Delta\text{mukB}$ ). The latter two strains contain a low-copy plasmid coding for Tsr-Venus proteins (see Materials and Methods) under the control of a *lac* promoter. SX4 cells further contain a plasmid expressing a nucleoid-

tagging protein, HupA-mCherry (Materials and Methods). We found no significant difference in the spatial distribution and kinetics of Tsr clusters between SX4 and MG1655 cells. Also, we found no significant difference in nucleoid lengths when measured by DAPI/SYTOX Orange staining and by HupA-mCherry tagging, and we saw no difference in the Tsr spatial distributions when we visualized the nucleoids with either method (Fig. S9). Further, it is worth noting that, since under normal conditions the *tsr* gene is highly expressed (46), small amounts of exogenous Tsr-Venus are expected to cause minimal perturbations to normal cell functioning. Finally, unless stated otherwise, the results refer to measurements obtained using the MG1655 strain.

## Spatial distributions of nucleoids and Tsr protein clusters

First, in SX4 cells, we assessed whether the spatial distributions of Tsr clusters and nucleoids are consistent with a nucleoid-exclusion phenomenon affecting the clusters' location. To do so, from images taken 1 h after induction of Tsr-Venus expression, we compared the spatial distributions of nucleoids (DAPI stained) and Tsr clusters in cells with relatively large and relatively small nucleoids.

Based on the data from 1195 cells, we selected the 10% of cells with relatively larger and relatively smaller nucleoid(s) (along the major cell axis). Cells at the thresholds of nucleoid length were included in the analysis. Also, we did not exclude cells with two nucleoids, and thus we expected that at least some of the cells with larger nucleoid(s) would have two nucleoids. The results (Fig. 1, *thin black line*) support this expectation, as in the 10% of cells with larger nucleoid(s), the fluorescence intensity from nucleoid(s) exhibits a local minimum at midcell (as the two nucleoids are at the focal points).

As is visible in Fig. 1, the center of mass of the DAPI intensity distribution is significantly closer (in a statistical sense) to the cell center in cells with relatively small nucleoids ( $0.37 \pm 0.01$ ) than in those with relatively large nucleoids ( $0.42 \pm 0.00$ ; Kolmogorov-Smirnov (KS) test,  $p < 0.01$ ). Also, the Tsr protein clusters are significantly farther away from midcell in cells with relatively larger nucleoid-occupied regions (KS test,  $p < 0.01$ ), as would be expected if nucleoid exclusion affects their location. In particular, the center of mass of the Tsr fluorescent intensities is  $0.72 \pm 0.02$  in cells with relatively larger nucleoids and  $0.66 \pm 0.02$  in cells with relatively smaller nucleoids. The same phenomenon was observed in cells of the MG1655 strain (data not shown).

As these results could be affected by the normalization of the cell lengths (provided, e.g., that most cells with relatively larger nucleoids also had larger absolute lengths, which can be expected), we performed the same analysis on a subset of cells that exhibited similar absolute lengths (all within  $2.8 \pm 0.5 \mu\text{m}$ ). From this subset, we again

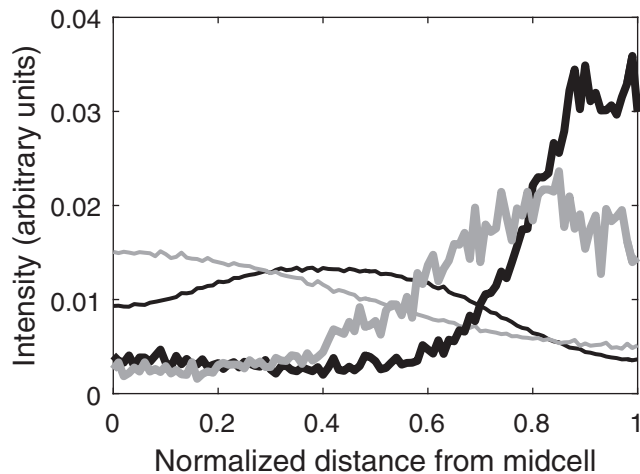

FIGURE 1 Averaged spatial distributions of fluorescence intensity (in arbitrary units (a.u.)) of Tsr-Venus and nucleoids along the major cell axis (collapsed axis, from midcell to cell extreme). The thin black line is the average nucleoid fluorescence intensity distribution from the 10% of cells with the largest relative nucleoid(s) (due to the existence of two nucleoids; 155 cells), and the thin gray line is the same distribution from the 10% of cells with the smallest relative nucleoid lengths (126 cells). The bold black and gray lines are the average spatial distributions along the major cell axis of Tsr-Venus fluorescence intensity in cells with relatively larger and smaller nucleoids, respectively.

selected the 10% of cells with larger (70 cells) and smaller (70 cells) nucleoids. We then confirmed that the cell lengths of these two subsets of cells did not differ significantly (KS test,  $p = 0.73$ ). Finally, we performed the same test as above and found that in the cells with larger nucleoids, the Tsr clusters were closer to the cell extremities, i.e., the center of mass of the DAPI intensity distribution was significantly closer (in a statistical sense) to the cell center in cells with relatively small nucleoids ( $0.34 \pm 0.01$ ) than in those with relatively large nucleoids ( $0.42 \pm 0.01$ ; KS test,  $p < 0.01$ ). Also, the Tsr molecules were farther away from midcell in cells with relatively larger nucleoid-occupied regions (KS test,  $p \approx 0.02$ ), as would be expected if nucleoid exclusion affects the location of the clusters. The center of mass of the Tsr fluorescent intensities was  $0.65 \pm 0.02$  in cells with relatively smaller nucleoids and  $0.72 \pm 0.02$  in cells with relatively larger nucleoids.

The above results do not rule out the (unlikely) possibility that cells with larger nucleoids (e.g., close to dividing) also possess more Tol-Pal, indirectly causing the Tsr clusters to be located closer (on average) to the cell extremities. To investigate this possibility, from the data above, we selected cells with the same absolute nucleoid length (within a small range). Note that these cells differ in total cell length. If Tol-Pal levels are nucleoid-length dependent, these cells should all exhibit similar Tol-Pal levels. As such, if nucleoid exclusion is not relevant to the Tsr clusters' location, these cells should not exhibit a tangible correlation between the absolute cell length and absolute distance of Tsr clusters to the

nearest cell extremity. We obtained that correlation and found it to be equal to 0.73 ( $p < 0.01$ ), showing that in cells with similar nucleoid lengths but different cell lengths, the clusters behave differently and in accordance with a nucleoid-exclusion phenomenon.

In addition to the tests above, we also performed microscopy time-series measurements (see [Materials and Methods](#)) in which the expression of Tsr-Venus was only activated after we started observations. From these data, we assessed the location of the Tsr clusters when they first appeared. The data in [Fig. S6](#) show that the clusters usually first appeared (i.e., became detectable) when they were already at the poles, where they tended to remain thereafter. From this, one can conclude that most clusters remain at the poles for most, if not all, of their lifetime.

### Asymmetries in the spatial distributions of nucleoids and Tsr protein clusters

Finally, in search of additional evidence of nucleoid exclusion from the midcell of Tsr clusters, we assessed whether, at the single-cell level, asymmetries in the position of the nucleoid center along the major cell axis ([34,47,48](#)) are correlated with asymmetries in the Tsr clusters location. From the set of SX4 cells mentioned above (1195 cells), for each cell, we obtained the fluorescence intensity from Tsr clusters at each pole (using the definition of "pole" in [Materials and Methods](#)) and the normalized location of the nucleoid center relative to the cell center along the major axis, and calculated the Pearson correlation between these variables. As would be expected if there is nucleoid exclusion of the Tsr clusters from midcell, we found a significant ( $p \ll 0.01$ ) correlation of  $-0.52$  with a 95% confidence interval (CI) of  $[-0.57, -0.48]$ .

It is possible that this result is associated with the age of the poles, since the older pole of a cell would contain more Tol-Pal complexes and, simultaneously, off-centered nucleoids would preferentially locate closer to the older pole (although no evidence for either phenomenon has been reported so far).

To assess whether the position of the nucleoid(s), when off-centered, is biased toward the newer (or older) pole ([34,49,50](#)), we localized the nucleoid center along the major axis at each moment during the cell's lifetime (tracked from birth to division). Then, we obtained the fraction of times a nucleoid was located at the newer side of the cell. Next, we assessed whether the data collected from all cells could have resulted from an unbiased binomial distribution. We obtained a  $p$ -value of 0.148, consistent with the data being extracted from an unbiased binomial. We conclude that the asymmetries in nucleoid(s) positioning are not biased toward the newer (or older) pole, and thus differences in pole age are not a source of the anticorrelation in the positioning of the nucleoid and Tsr clusters in individual cells.

Similarly, we assessed whether the clusters' choice of pole is correlated with the pole age (Supporting Materials and Methods). We found no evidence for a tangible correlation. In addition, we also found no difference in the curvatures of the cell poles that could explain the asymmetries, at the single-cell level, in cluster numbers at each pole.

Overall, we conclude that there are heterogeneities and asymmetries in the spatial distribution of Tsr clusters that are consistent with a nucleoid-exclusion phenomenon and cannot be explained solely by a diffusion-and-capture mechanism caused by Tol-Pal complexes at the poles (24).

### Spatial distribution of Tsr clusters in cells subjected to ampicillin

Next, we subjected cells (SX4 strain) to ampicillin (these cells lack ampicillin resistance; see Materials and Methods), causing enhanced elongation while halting division (51,52). We performed this test to show that when the ratio between cell and nucleoid lengths is altered by external perturbation, the spatial distribution of Tsr-Venus clusters behaves as would be expected if it is affected both by diffusion-and-capture by Tol-Pal complexes at the cell poles and by nucleoid exclusion from midcell.

Note that although SX4 cells are sensitive to ampicillin (division is halted), most appeared to remain healthy (Fig. S4). This was verified with the Live/Dead BacLight Viability Kit, which stains viable cells but not the shells of deceased cells (Materials and Methods). Also, we observed that once the drug was removed from the medium, the cells recovered and started dividing (as observed in the microscope and by spectrophotometry). As an additional precaution, during image analysis, we manually discarded (by visual inspection) cells that exhibited inclusion bodies and spheroplasts that commonly appear after ampicillin treatment, as these could affect the Tsr cluster dynamics. The remaining cells exhibited a normal rate of accumulation of Tsr clusters (as observed by inspection).

From the images of control cells and cells subjected to ampicillin, we selected cells whose length ranged from 3.5 to 4.0  $\mu\text{m}$  and compared their mean relative nucleoid length (Fig. S5) and center of mass of the Tsr fluorescence intensity distribution. As shown in Table 1, we found that as the nucleoid became longer relative to the cell length, the center of mass of the distribution of Tsr-Venus moved toward the cell extremities, as would be expected from the existence of a nucleoid-exclusion phenomenon.

### Effects of Tol-Pal complex deletion on the spatial distribution of Tsr

We next assessed whether, in the absence of Tol-Pal, the Tsr clusters would no longer exhibit a preference for a polar localization. For this purpose, we compared the mean fraction of Tsr fluorescence intensity at the poles in control (WT) and  $\Delta\text{tolpal}$  cells. The results are shown in Table 2, along with the 95% CIs and the results of a test of statistical comparison between the conditions.

Finally, we performed KS tests, which showed that the mean percentage of fluorescence intensity in the cells (in both WT and  $\Delta\text{tolpal}$  cells) was inconsistent with a normal fluorescence intensity along the major axis, which would be expected if Tsr proteins are distributed solely by means of diffusion ( $p$ -value much smaller than 0.01 for a normal distribution with a mean fluorescence at the poles equaling 50% of the total fluorescence).

As shown in Table 2, in both WT and  $\Delta\text{tolpal}$  cells, the mean fraction of Tsr clusters at the poles is much higher than would be expected by chance (i.e., when compared with a uniform distribution along the major cell axis). This finding and the KS tests indicate that diffusion-and-capture by Tol-Pal is not the only cause of the Tsr clusters' preference for polar localization, even though the presence of Tol-Pal does significantly increase the fraction of clusters at the poles (the  $p$ -value from a two-tailed Student's  $t$ -test of statistical significance is much smaller than 0.01), as expected from previous studies (24).

### Effects of Tol-Pal deletion on the spatial distribution of Tsr as a function of nucleoid length

If Tsr clusters are preferentially located at the cell poles due to a diffusion-and-capture mechanism caused by Tol-Pal complexes and a nucleoid-exclusion phenomenon, we expect that if at least one of these mechanisms is present, the Tsr clusters will still preferentially locate at the poles, although not as pronouncedly as they would if both mechanisms were active.

Given that we expect the effects of nucleoid exclusion on the Tsr clusters' spatial distribution to be gradual as a function of the nucleoid length, to study this, from the data above, we measured in each cell the relative distance of each cluster to the nearest cell extreme as well as the relative nucleoid length. Then, for WT and  $\Delta\text{tolpal}$  cells separately, we selected the cells with relatively smaller

**TABLE 1 Mean Relative Nucleoid Length and Center of Mass of the Averaged Tsr Fluorescence Distribution of the Control and Ampicillin-Treated Cells**

| Condition  | No. of Cells | Mean Relative Nucleoid Length with 95% CI ( $\mu\text{m}$ ) | Center of Mass of the Averaged Tsr Fluorescence Distribution with 95% CI |
|------------|--------------|-------------------------------------------------------------|--------------------------------------------------------------------------|
| Control    | 105          | 0.71 $\pm$ 0.01                                             | 0.69 $\pm$ 0.02                                                          |
| Ampicillin | 79           | 0.75 $\pm$ 0.02                                             | 0.75 $\pm$ 0.03                                                          |

Also shown are the 95% CIs and the number of cells examined in each condition.

**TABLE 2** Mean Percentage of Fluorescence Intensity at the Cell Poles for WT and  $\Delta tolpal$  Cells

|                                          | WT           | $\Delta tolpal$ | Student's <i>t</i> -test<br>(WT versus $\Delta tolpal$ ) |
|------------------------------------------|--------------|-----------------|----------------------------------------------------------|
| Number of cells                          | 176          | 138             | –                                                        |
| Mean fluorescence intensity at poles (%) | 96.2         | 88.8            | <0.01                                                    |
| 95% CI (%)                               | [95.0, 97.3] | [85.3, 92.3]    | –                                                        |

Shown are the number of cells observed, the percentage of total fluorescence intensity located at the poles, and the corresponding 95% CIs. Also shown is the *p*-value of the Student's *t*-test between WT and  $\Delta tolpal$ .

( $\leq 35\%$  of the cell length) and larger ( $\geq 65\%$  of the cell length) nucleoids.

From the data, we first plotted the relative distance of each cluster to the nearest cell extreme versus the normalized nucleoid length in each condition (Fig. 2, A and B, for WT and deletion mutants, respectively). Visibly, at least for cells with relatively small nucleoids, the presence/absence of Tol-Pal complexes appears to be an influencing factor (as expected (24)), since in their absence the Tsr clusters are more uniformly scattered throughout the major cell axis (Fig. 2 B). This difference in the Tsr clusters' behavior due to the presence/absence of Tol-Pal complexes is less clear in cells with relatively large nucleoids (Fig. 2, A and B), in agreement with our hypothesis that nucleoid exclusion contributes to the Tsr clusters' preference for a polar localization. These results are also in line with those shown in Fig. 1.

To quantify the differences in the Tsr clusters' behavior between conditions more precisely, we calculated the degree of correlation of the Tsr clusters' relative locations along the major cell axis between all pairs of conditions (Table S2). We expected this correlation to be significant between conditions differing solely in nucleoid length (as the Tol-Pal diffusion-and-capture mechanism is present) and between cells with large nucleoids differing in the presence/absence of Tol-Pal complexes (as nucleoid exclusion is strong). Between other pairs of conditions, we expected a weaker

or no correlation. The results in Table S2 confirm these expectations, showing that for the latter, the correlations become nonsignificant.

Finally, note that the degree of the correlation between WT cells with small nucleoids and  $\Delta tolpal$  cells with large nucleoids suggests that the two mechanisms (Tol-Pal diffusion-and-capture and nucleoid exclusion) have similar effects when they act solely. Overall, the results in Table S2 further suggest that the two mechanisms have complementary effects.

In addition, this single-cell analysis of the spatial distribution of individual clusters as a function of relative nucleoid length allows us to conclude that the effects of the phenomenon of exclusion from midcell change gradually with changing nucleoid lengths, as expected (Figs. S7 and S8).

### Effects of mukB deletion on the spatial distribution of Tsr clusters

Next, to further test whether nucleoid exclusion contributes to the preferential polar localization of Tsr clusters, we studied their localization in cells where the nucleoid is absent. For this purpose, we made use of mutant cells lacking the mukB protein ( $\Delta mukB$ ) (Materials and Methods). A fraction of these cells lack the nucleoid (thus becoming anucleate cells) due to failures in chromosome segregation in cell division (53). We verified this spontaneous formation of anucleate cells by visually inspecting the microscope images. In  $\Delta mukB$  cells, although the Tsr clusters will still preferentially locate at the poles due to the presence of Tol-Pal complexes (24), their fraction at midcell is expected to increase compared with control cells (see Fig. 3, where the two cells lacking nucleoid visibly have a larger fraction of Tsr clusters at midcell than the other cells in the image).

From the images, we segmented and analyzed 302 cells, 68 of which were anucleate (as determined by visual inspection of the red channel). We compared the relative positioning along the major axis of the Tsr clusters in these cells and in WT cells (1195 control cells). The results are

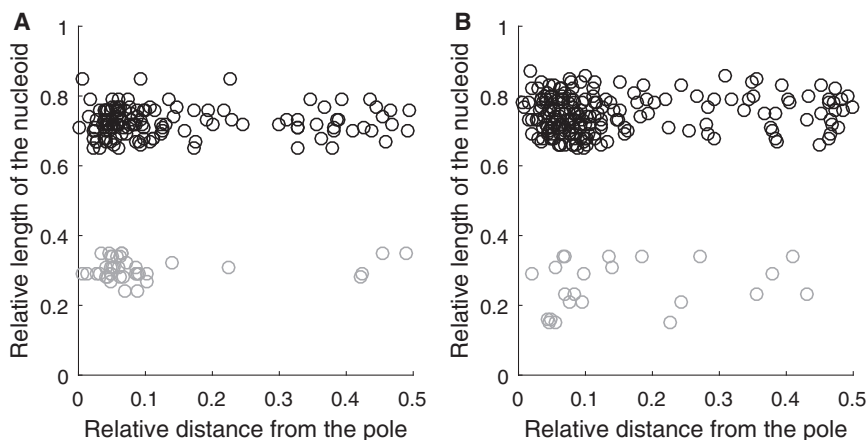

**FIGURE 2** (A) Relative nucleoid length versus the relative distance of individual Tsr clusters from the closest cell extremity in WT cells: 133 Tsr clusters from 52 cells whose nucleoid length is  $\geq 65\%$  of the cell length are shown in black, and 39 Tsr clusters from 17 cells whose nucleoid length is  $\leq 35\%$  of the cell length are shown in gray. (B) Relative nucleoid length versus relative distance of individual Tsr clusters from the closest cell extremity in  $\Delta tolpal$  cells: 198 Tsr clusters from 88 cells whose nucleoid length is  $\geq 65\%$  of the cell length are shown in black, and 23 Tsr clusters from eight cells whose nucleoid length is  $\leq 35\%$  of the cell length are shown in gray.

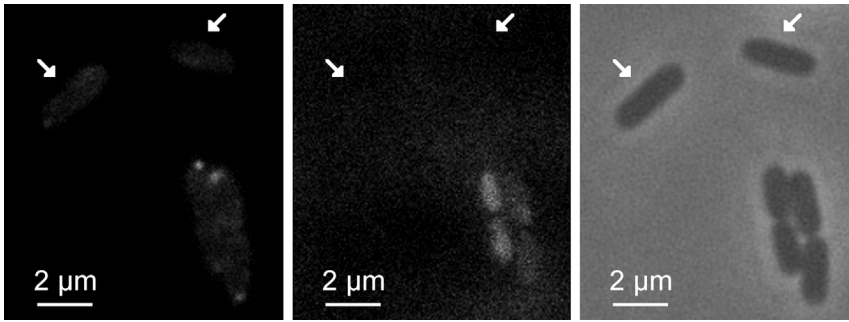

FIGURE 3 Localization of Tsr-Venus in  $\Delta mukB$  cells at 37°C. Nucleoids were visualized by SYTOX Orange dye. The arrows indicate anucleate cells. Left: green channel showing Tsr-Venus. Middle: red channel showing nucleoids. Right: phase-contrast images showing the cell borders used for cell segmentation.

shown in Fig. 4. Whereas in  $\Delta mukB$  cells the center of mass of the fluorescence intensity distribution of Tsr is at  $0.59 \pm 0.03$ , in control cells it is at  $0.70 \pm 0.01$ , i.e., the Tsr clusters are much closer to the cell extremities in the control cells, with the two distributions differing significantly in a statistical sense (KS test,  $p \ll 0.01$ ). This supports the hypothesis that nucleoid exclusion enhances the Tsr clusters' preference for polar localization.

#### Effects of increased cytoplasm viscosity on the spatial distribution of Tsr clusters

We performed a final measurement to further strengthen the hypothesis that nucleoid exclusion from midcell enhances the Tsr clusters' preference for polar localization. Under reduced metabolic activity or suboptimal temperatures, the cytoplasm of *E. coli* is known to acquire glass-like features (54) that enhance its viscosity (48). This in turn greatly reduces the effects of nucleoid exclusion on the spatial distribution of large protein complexes (48).

We subjected  $\Delta tolpal$  cells to low temperatures and assessed whether, in cells with relatively large nucleoids

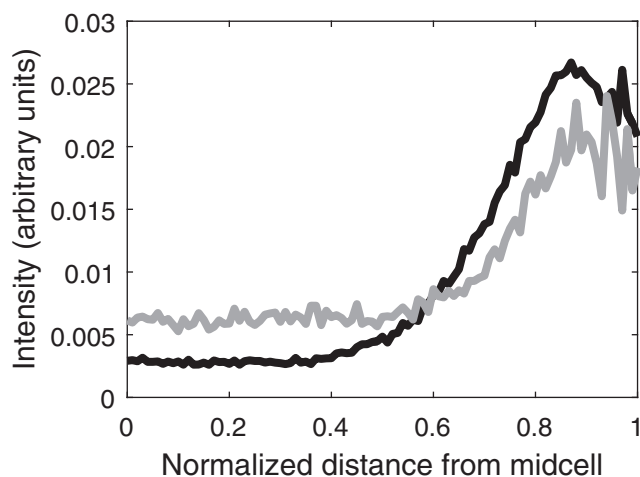

FIGURE 4 Spatial distributions of average fluorescence intensity (in a.u.) of Tsr-Venus proteins along the major cell axis (collapsed axis, from midcell to cell extremes). The black line is the fluorescence intensity distribution averaged over 1195 control cells, and the gray line is the same distribution averaged over 68 anucleate  $\Delta mukB$  cells.

(i.e., occupying 65–80% of the cell length), the degree of exclusion of Tsr clusters from midcell decreases gradually as the temperature decreases. We studied  $\Delta tolpal$  cells alone, as the effects of lower temperatures on the functionality of Tol-Pal are unknown. The results are shown in Fig. 5.

As can be seen in Fig. 5, the fraction of Tsr clusters at the poles decreases gradually with gradually decreasing temperature, as expected from the increased cytoplasm viscosity (48). As a side note, since this decrease is best fitted by a straight line (using a weighted least-square fit (55) and the Akaike information criterion (56)), we expect that in the absence of Tol-Pal, only nucleoid exclusion is involved in the segregation of clusters to the poles.

#### Stochastic model of nucleoid exclusion of Tsr clusters from midcell

Next, we made use of a stochastic model (for a complete description, see Supporting Materials and Methods) to test whether a nucleoid-exclusion mechanism could reproduce

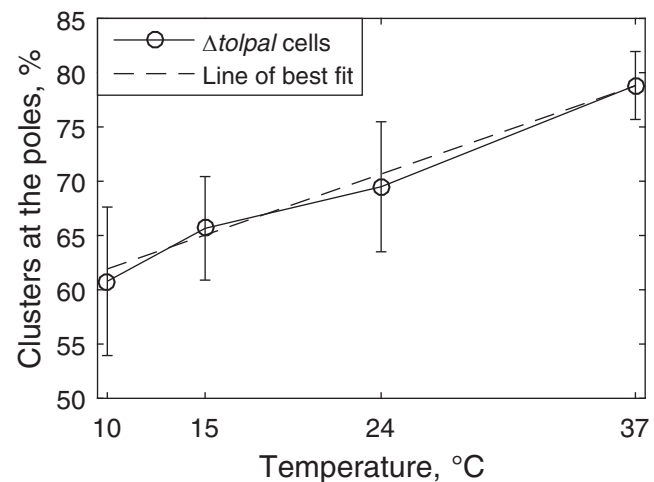

FIGURE 5 Percentage of Tsr clusters at the poles in  $\Delta tolpal$  cells with relatively large nucleoids (occupying 65–80% of the cell length) as a function of temperature. The error bars correspond to one standard uncertainty. A line and a polynomial of second order were fitted to the data points by weighted least-square fit. The Akaike information criterion showed that the best-fitting model is a line (dashed line).



the empirical data. Note that in this model, the nucleoid-exclusion phenomenon acts only on Tsr proteins that are unbound to the membrane, in accordance with (26).

The model uses empirical data regarding Tsr production and degradation rates (35,57) and cell and nucleoid sizes (length and width) obtained from SX4 cells (Supporting Materials and Methods). Also, the clusters' diffusion rate and unbinding rate from Tol-Pal complexes are tuned so that the *in silico* spatial distributions of Tsr in cells with relatively large and relatively small nucleoids fit the empirical data (Fig. 2 A).

Using this fitted model, we first tested whether the model could reproduce the observed effect of asymmetries in nucleoid positioning on the Tsr distributions along the major cell axis at the single-cell level. We found a significant ( $p \ll 0.01$ ) correlation of  $-0.65$  with a 95% CI of  $[-0.68, -0.62]$ .

Thus, the stochastic model, assuming the existence of nucleoid exclusion and asymmetries in nucleoid positioning, reproduces the empirical observations of a strong anticorrelation between Tsr clusters and nucleoid location at the single-cell level.

Next, we assessed whether imposing differences in nucleoid length, along with assuming the presence and absence of Tol-Pal, would suffice to reproduce the observed differences in the Tsr spatial distributions observed *in vivo*. The results are shown in Table S3.

If we compare Tables S2 and S3, we observe a strong similarity between the model and the measurements. In short, in cases where the measurements indicate strong correlations, the model is in agreement. However, in cases where the measurements show no correlation, the model suggests much weaker correlations than in the cases where the measurements indicate strong correlations. However, the detected correlations in the simulations (Table S3, line 1, columns 2 and 3) are expected (since although smaller nucleoids should be less efficient in excluding Tsr clusters from midcell, they are not expected to be entirely ineffective). As a side note, these results also agree with the empirical data from cells subjected to ampicillin (which results in cells with relatively larger nucleoids) versus control cells.

Overall, we conclude that the dynamics of Tsr clusters of a model assuming a diffusion-and-capture mechanism caused by Tol-Pal at the poles, along with a mechanism of volume exclusion from midcell caused by the presence of the nucleoid, is in agreement with the empirical data.

## DISCUSSION

Chemoreceptor proteins can assemble into large arrays, which is believed to enhance the signal-processing capabilities of the receptor system (6–9), allowing proper chemotaxis (5). In agreement with this, their ability to cluster is conserved in all known prokaryotic chemotaxis systems (58).

In *E. coli*, these clusters preferentially locate at the cell poles. This preference for polar localization may further enhance the clustering process itself and thus the signal-processing capabilities. A recent study suggested that this preference for polar localization is due to a mechanism of diffusion-and-capture made possible by Tol-Pal complexes at the cell poles (24).

Recent observations also showed that at any given time, several Tsr clusters are not in a fixed position, but rather diffuse freely within the polar region (26) (or more rarely at midcell), and that in spherical cells (when the cytoskeletal protein MreB is disrupted) the clusters are more fragmented and the fraction of freely diffusing ones increases (26). Given these observations, and the known ability of the nucleoid to exclude macromolecules such as plasmids and large protein complexes from midcell (31–34,47), we investigated the possibility that the preference of Tsr clusters for polar localization is supported by the presence of the nucleoid at midcell. For this purpose, we performed several tests while observing at the single-cell level both clusters and nucleoids.

All measurements performed here, including perturbations of the cytoplasm and cell growth, and observations in cells lacking Tol-Pal components or a nucleoid led to the same conclusion: Tsr clusters locate at the poles due to the presence of Tol-Pal at the poles along with the presence of the nucleoid at midcell. Also, these two factors have complementary effects. In addition, two observations suggest that these are likely the only two mechanisms that ensure the Tsr clusters' preference for polar localization. First, in cells lacking Tol-Pal components, the preference for polar localization decreases linearly with decreasing temperature, suggesting that only one mechanism (nucleoid exclusion) is being affected. Second, in cells lacking Tol-Pal components with relatively small nucleoids, the ability to retain Tsr clusters at the poles is much weakened.

Strikingly, a mechanism of volume exclusion from midcell is only expected to be efficient if the chemoreceptor proteins are able to form sufficiently large clusters (see, e.g., (34,59,60)). As such, we suggest that cluster formation not only enhances the signal-processing capabilities of the chemotaxis protein arrays (6–9) but also is likely essential for ensuring that the clusters are located at the cell poles. Cluster formation should greatly enhance the chances that chemoreceptor proteins will reach and remain at the poles, which is expected to enhance the efficiency of the diffusion-and-capture mechanism made possible by Tol-Pal complexes at the cell extremities.

Recent studies showed that the nucleoid plays a central role in the spatial organization of plasmids (31,32) and unwanted protein aggregates (33,34) in the cytoplasm of *E. coli*, as well as in the choice of location of the cell-division septum (61). By showing how the nucleoid contributes to the spatial organization of sensory complexes, and thus to the functional response of *E. coli* populations to various

external stresses (43,62,63), our study further supports the notion that the nucleoid is critical for generating heterogeneities and asymmetries in the cytoplasm of *E. coli* that are essential for intracellular spatial organization and, combined with cell division, for cell-to-cell diversity within lineages.

## SUPPORTING MATERIAL

Supporting Materials and Methods, Supporting Results, nine figures, and three tables are available at [http://www.biophysj.org/biophysj/supplemental/S0006-3495\(16\)30951-1](http://www.biophysj.org/biophysj/supplemental/S0006-3495(16)30951-1).

## AUTHOR CONTRIBUTIONS

R.N.-V. performed experiments. S.S. and A.S.R. generated mathematical models and simulations. T.A. and S.S. performed image and data analysis. A.S.R. conceived the study. All authors contributed to the experimental design, discussion, and writing of the paper.

## ACKNOWLEDGMENTS

This work was supported by the Tampere University of Technology President's Graduate Programme (R.N.-V. and S.S.), the Academy of Finland (general research grant 295027 to A.S.R.), Academy of Finland Key Project Funding (305342 to A.S.R.), and the Jane and Aatos Erkko Foundation (610536 to A.S.R.).

## REFERENCES

- Sourjik, V., and H. C. Berg. 2004. Functional interactions between receptors in bacterial chemotaxis. *Nature*. 428:437–441.
- Lee, L., T. Mizuno, and Y. Imae. 1988. Thermosensing properties of *Escherichia coli* tsr mutants defective in serine chemoreception. *J. Bacteriol.* 170:4769–4774.
- Rebbapragada, A., M. S. Johnson, ..., B. L. Taylor. 1997. The Aer protein and the serine chemoreceptor Tsr independently sense intracellular energy levels and transduce oxygen, redox, and energy signals for *Escherichia coli* behavior. *Proc. Natl. Acad. Sci. USA*. 94:10541–10546.
- Wadhams, G. H., and J. P. Armitage. 2004. Making sense of it all: bacterial chemotaxis. *Nat. Rev. Mol. Cell Biol.* 5:1024–1037.
- Parkinson, J. S., P. Ames, and C. A. Studdert. 2005. Collaborative signaling by bacterial chemoreceptors. *Curr. Opin. Microbiol.* 8:116–121.
- Kentner, D., and V. Sourjik. 2006. Spatial organization of the bacterial chemotaxis system. *Curr. Opin. Microbiol.* 9:619–624.
- Endres, R. G. 2009. Polar chemoreceptor clustering by coupled trimers of dimers. *Biophys. J.* 96:453–463.
- Skidmore, J. M., D. D. Ellefson, ..., J. R. Maddock. 2000. Polar clustering of the chemoreceptor complex in *Escherichia coli* occurs in the absence of complete CheA function. *J. Bacteriol.* 182:967–973.
- Liberman, L., H. C. Berg, and V. Sourjik. 2004. Effect of chemoreceptor modification on assembly and activity of the receptor-kinase complex in *Escherichia coli*. *J. Bacteriol.* 186:6643–6646.
- Kentner, D., S. Thiem, ..., V. Sourjik. 2006. Determinants of chemoreceptor cluster formation in *Escherichia coli*. *Mol. Microbiol.* 61:407–417.
- Greenfield, D., A. L. McEvoy, ..., J. Liphardt. 2009. Self-organization of the *Escherichia coli* chemotaxis network imaged with super-resolution light microscopy. *PLoS Biol.* 7:e1000137.
- Thiem, S., D. Kentner, and V. Sourjik. 2007. Positioning of chemosensory clusters in *E. coli* and its relation to cell division. *EMBO J.* 26:1615–1623.
- Thiem, S., and V. Sourjik. 2008. Stochastic assembly of chemoreceptor clusters in *Escherichia coli*. *Mol. Microbiol.* 68:1228–1236.
- Wang, H., N. S. Wingreen, and R. Mukhopadhyay. 2008. Self-organized periodicity of protein clusters in growing bacteria. *Phys. Rev. Lett.* 101:218101.
- Maddock, J. R., and L. Shapiro. 1993. Polar location of the chemoreceptor complex in the *Escherichia coli* cell. *Science*. 259:1717–1723.
- Sourjik, V., and H. C. Berg. 2000. Localization of components of the chemotaxis machinery of *Escherichia coli* using fluorescent protein fusions. *Mol. Microbiol.* 37:740–751.
- Zhang, P., C. M. Khursigara, ..., S. Subramaniam. 2007. Direct visualization of *Escherichia coli* chemotaxis receptor arrays using cryo-electron microscopy. *Proc. Natl. Acad. Sci. USA*. 104:3777–3781.
- Huang, K. C., R. Mukhopadhyay, and N. S. Wingreen. 2006. A curvature-mediated mechanism for localization of lipids to bacterial poles. *PLOS Comput. Biol.* 2:e151.
- Rudner, D. Z., Q. Pan, and R. M. Losick. 2002. Evidence that subcellular localization of a bacterial membrane protein is achieved by diffusion and capture. *Proc. Natl. Acad. Sci. USA*. 99:8701–8706.
- Ebersbach, G., A. Briegel, ..., C. Jacobs-Wagner. 2008. A self-associating protein critical for chromosome attachment, division, and polar organization in *caulobacter*. *Cell*. 134:956–968.
- Bowman, G. R., L. R. Comolli, ..., L. Shapiro. 2008. A polymeric protein anchors the chromosomal origin/ParB complex at a bacterial cell pole. *Cell*. 134:945–955.
- Ringgaard, S., K. Schirmer, ..., M. K. Waldor. 2011. A family of ParA-like ATPases promotes cell pole maturation by facilitating polar localization of chemotaxis proteins. *Genes Dev.* 25:1544–1555.
- Yamaichi, Y., R. Bruckner, ..., M. K. Waldor. 2012. A multidomain hub anchors the chromosome segregation and chemotactic machinery to the bacterial pole. *Genes Dev.* 26:2348–2360.
- Santos, T. M. A., T. Y. Lin, ..., D. B. Weibel. 2014. Polar localization of *Escherichia coli* chemoreceptors requires an intact Tol-Pal complex. *Mol. Microbiol.* 92:985–1004.
- Sturgis, J. N. 2001. Organisation and evolution of the tol-pal gene cluster. *J. Mol. Microbiol. Biotechnol.* 3:113–122.
- Oh, D., Y. Yu, ..., K. Ritchie. 2014. Dynamics of the serine chemoreceptor in the *Escherichia coli* inner membrane: a high-speed single-molecule tracking study. *Biophys. J.* 106:145–153.
- Fisher, J. K., A. Bourniquel, ..., N. Kleckner. 2013. Four-dimensional imaging of *E. coli* nucleoid organization and dynamics in living cells. *Cell*. 153:882–895.
- Niki, H., A. Jaffé, ..., S. Hiraga. 1991. The new gene mukB codes for a 177 kd protein with coiled-coil domains involved in chromosome partitioning of *E. coli*. *EMBO J.* 10:183–193.
- Winkler, J., A. Seybert, ..., B. Bukau. 2010. Quantitative and spatio-temporal features of protein aggregation in *Escherichia coli* and consequences on protein quality control and cellular ageing. *EMBO J.* 29:910–923.
- Coquel, A. S., J. P. Jacob, ..., H. Berry. 2013. Localization of protein aggregation in *Escherichia coli* is governed by diffusion and nucleoid macromolecular crowding effect. *PLOS Comput. Biol.* 9:e1003038.
- Reyes-Lamothe, R., T. Tran, ..., M. E. Tolmasky. 2014. High-copy bacterial plasmids diffuse in the nucleoid-free space, replicate stochastically and are randomly partitioned at cell division. *Nucleic Acids Res.* 42:1042–1051.
- Vecchiarelli, A. G., K. Mizuuchi, and B. E. Funnell. 2012. Surfing biological surfaces: exploiting the nucleoid for partition and transport in bacteria. *Mol. Microbiol.* 86:513–523.
- Straight, P. D., M. A. Fischbach, ..., R. Kolter. 2007. A singular enzymatic megacomplex from *Bacillus subtilis*. *Proc. Natl. Acad. Sci. USA*. 104:305–310.

34. Gupta, A., J. Lloyd-Price, ..., A. S. Ribeiro. 2014. In vivo kinetics of segregation and polar retention of MS2-GFP-RNA complexes in *Escherichia coli*. *Biophys. J.* 106:1928–1937.
35. Yu, J., J. Xiao, ..., X. S. Xie. 2006. Probing gene expression in live cells, one protein molecule at a time. *Science*. 311:1600–1603.
36. Baba, T., T. Ara, ..., H. Mori. 2006. Construction of *Escherichia coli* K-12 in-frame, single-gene knockout mutants: the Keio collection. *Mol. Syst. Biol.* 2:2006.0008.
37. Chazotte, B. 2011. Labeling nuclear DNA using DAPI. *Cold Spring Harb. Protoc.* 2011:t5556.
38. Bakshi, S., H. Choi, ..., J. C. Weisshaar. 2014. Nonperturbative imaging of nucleoid morphology in live bacterial cells during an antimicrobial peptide attack. *Appl. Environ. Microbiol.* 80:4977–4986.
39. Boulos, L., M. Prévost, ..., R. Desjardins. 1999. LIVE/DEAD BacLight : application of a new rapid staining method for direct enumeration of viable and total bacteria in drinking water. *J. Microbiol. Methods.* 37:77–86.
40. Tokunaga, M., N. Imamoto, and K. Sakata-Sogawa. 2008. Highly inclined thin illumination enables clear single-molecule imaging in cells. *Nat. Methods.* 5:159–161.
41. Chowdhury, S., M. Kandhavelu, ..., A. S. Ribeiro. 2013. Cell segmentation by multi-resolution analysis and maximum likelihood estimation (MAMLE). *BMC Bioinformatics.* 14 (Suppl 10):S8.
42. Häkkinen, A., A. B. Muthukrishnan, ..., A. S. Ribeiro. 2013. CellAging: a tool to study segregation and partitioning in division in cell lineages of *Escherichia coli*. *Bioinformatics.* 29:1708–1709.
43. Annala, T., R. Neeli-Venkata, and A. S. Ribeiro. 2016. Robustness to sub-optimal temperatures of the processes of Tsr cluster formation and positioning in *Escherichia coli*. *Proc. 9th Int. Jt. Conf. Biomed. Eng. Syst. Technol.* 3:137–141.
44. Lloyd-Price, J., S. Startceva, ..., A. S. Ribeiro. 2016. Dissecting the stochastic transcription initiation process in live *Escherichia coli*. *DNA Res.* 23:203–214.
45. Lloyd-Price, J., A. Gupta, and A. S. Ribeiro. 2012. SGNS2: a compartmentalized stochastic chemical kinetics simulator for dynamic cell populations. *Bioinformatics.* 28:3004–3005.
46. Mowbray, S. L. 1999. Bacterial chemoreceptors: recent progress in structure and function. *Mol. Cells.* 9:115–118.
47. Neeli-Venkata, R., A. Martikainen, ..., A. S. Ribeiro. 2016. Robustness of the process of nucleoid exclusion of protein aggregates in *Escherichia coli*. *J. Bacteriol.* 198:898–906.
48. Oliveira, S. M. D., R. Neeli-Venkata, ..., A. S. Ribeiro. 2016. Increased cytoplasm viscosity hampers aggregate polar segregation in *Escherichia coli*. *Mol. Microbiol.* 99:686–699.
49. Lindner, A. B., R. Madden, ..., F. Taddei. 2008. Asymmetric segregation of protein aggregates is associated with cellular aging and rejuvenation. *Proc. Natl. Acad. Sci. USA.* 105:3076–3081.
50. Ping, L., B. Weiner, and N. Kleckner. 2008. Tsr-GFP accumulates linearly with time at cell poles, and can be used to differentiate ‘old’ versus ‘new’ poles, in *Escherichia coli*. *Mol. Microbiol.* 69:1427–1438.
51. Spratt, B. G. 1975. Distinct penicillin binding proteins involved in the division, elongation, and shape of *Escherichia coli* K12. *Proc. Natl. Acad. Sci. USA.* 72:2999–3003.
52. Yao, Z., D. Kahne, and R. Kishony. 2012. Distinct single-cell morphological dynamics under beta-lactam antibiotics. *Mol. Cell.* 48:705–712.
53. Onogi, T., M. Yamazoe, ..., S. Hiraga. 2000. Null mutation of the *dam* or *seqA* gene suppresses temperature-sensitive lethality but not hypersensitivity to novobiocin of *muk* null mutants. *J. Bacteriol.* 182:5898–5901.
54. Parry, B. R., I. V. Surovtsev, ..., C. Jacobs-Wagner. 2014. The bacterial cytoplasm has glass-like properties and is fluidized by metabolic activity. *Cell.* 156:183–194.
55. Chatterjee, S., and A. S. Hadi. 2006. Regression Analysis by Example. John Wiley & Sons, Hoboken, NJ.
56. Akaike, H. 1974. A new look at the statistical model identification. *IEEE Trans. Automat. Contr.* 19:716–723.
57. Taniguchi, Y., P. J. Choi, ..., X. S. Xie. 2010. Quantifying *E. coli* proteome and transcriptome with single-molecule sensitivity in single cells. *Science*. 329:533–538.
58. Gestwicki, J. E., A. C. Lamanna, ..., J. Adler. 2000. Evolutionary conservation of methyl-accepting chemotaxis protein location in Bacteria and Archaea. *J. Bacteriol.* 182:6499–6502.
59. Rudner, D. Z., and R. Losick. 2010. Protein subcellular localization in bacteria. *Cold Spring Harb. Perspect. Biol.* 2:a000307.
60. Thompson, S. R., G. H. Wadhams, and J. P. Armitage. 2006. The positioning of cytoplasmic protein clusters in bacteria. *Proc. Natl. Acad. Sci. USA.* 103:8209–8214.
61. Gupta, A., J. Lloyd-Price, ..., A. S. Ribeiro. 2014. Robustness of the division symmetry in *Escherichia coli* and functional consequences of symmetry breaking. *Phys. Biol.* 11:066005.
62. Alon, U., M. G. Surette, ..., S. Leibler. 1999. Robustness in bacterial chemotaxis. *Nature*. 397:168–171.
63. Oleksiuk, O., V. Jakovljevic, ..., V. Sourjik. 2011. Thermal robustness of signaling in bacterial chemotaxis. *Cell.* 145:312–321.

**Biophysical Journal, Volume 111**

**Supplemental Information**

**Polar Localization of the Serine Chemoreceptor of *Escherichia coli* Is  
Nucleoid Exclusion-Dependent**

**Ramakanth Neeli-Venkata, Sofia Startceva, Teppo Annala, and Andre S. Ribeiro**

## Supporting Material for “Polar Localization of the Serine Chemoreceptor of *Escherichia coli* is Nucleoid Exclusion-Dependent”

Ramakanth Neeli-Venkata, Sofia Startceva, Teppo Annila, and Andre S. Ribeiro

### Fluorescent microplate reading

Aside from microscopy, the fluorescence from Tsr-Venus proteins under the control of  $P_{lac}$  was also measured with a Thermo Scientific\* Fluoroskan Ascent Microplate Fluorometer. Cells of the SX4 strain at  $OD_{600}$  of  $\sim 0.3$  were induced with various IPTG concentrations and grown at 37 °C with shaking, until reaching an  $OD_{600} \sim 0.6$ . From this, cells were centrifuged and suspended in PBS (Phosphate Buffered Saline). 150  $\mu$ l of the cells that were suspended in PBS were taken and placed on a 96 well microplate and measured for relative fluorescence levels of Venus protein with excitation (509 nm) and emission (538 nm) wavelengths (1). We performed 3 independent experiments with 3 replicates per condition.

### Image analysis

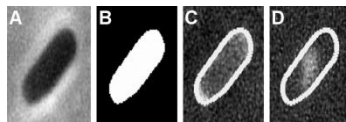

FIGURE S1 Example images used in Tsr clusters detection and nucleoid size and positioning estimation. (A) Phase contrast image. (B) Segmented cell by semi-automated segmentation from phase contrast image. (C) Corresponding fluorescent image for Tsr clusters detection (note the crescent shaped cluster at the lower pole) along with the detected cell border (segmented). (D) Example image of a cell with segmented border and fluorescence from a DAPI-stained nucleoid.

### Stochastic models

Tsr is a trans-membrane protein that is not expected to be significantly affected by nucleoid exclusion when bound to the membrane. However, not all Tsr proteins are attached to the inner membrane at any given time. First, when produced, these proteins will diffuse in the cytoplasm, prior to reaching the inner membrane. Also, each Tsr is expected to be in a transient state between cytoplasmic and membrane-bound, with significant preference for the membrane-bound state. In particular, according to measurements (2), a significant fraction of Tsr proteins freely diffuse at any given moment, indicating that the rates of binding and unbinding of Tsr to the inner membrane likely do not differ by several orders of magnitude. We expect that it is when

unbound from the membrane that the Tsr proteins are subject to being excluded to the poles due to the presence of the nucleoid at midcell.

We implemented a 2-dimensional (2D) model, where the cell and nucleoid are modelled as rectangles with semicircular poles, as in previous models (2–7). Cell growth and nucleoid replication are not considered. The cell membranes and nucleoid are impenetrable to the Tsr clusters and, unless stated otherwise, the nucleoid center is precisely at the cell center (Fig. S2).

A model cell is a 2-dimensional grid of square blocks, with an inner and an outer membrane. The inner membrane is one-block-wide and encloses the intracellular environment. Tsr proteins can only enter a block of the inner membrane if Tol-Pal is present (‘membrane blocks’ with Tol-Pal are named ‘Tol-Pal blocks’). The outer membrane is a 1-block-wide layer of blocks to which Tsr proteins cannot move to. Inner blocks occupied by the nucleoid or the cytoplasm are named ‘nucleoid blocks’ or ‘cytoplasm blocks’, respectively. Model Tsr proteins can move to any passable block at a fixed rate (nucleoid, inner membrane without Tol-Pal, and outer membrane blocks are not passable). At a Tol-Pal block, the rate of passage to a neighbor passable block is smaller than at a cytoplasm block.

The Tol-Pal diffusion-and-capture mechanism is implemented in the inner membrane blocks at the poles (Fig. S2), with each block having a rate of passage that is weighted so as to represent the ‘binding strength’ of Tol-Pal in a 3-dimensional cell. The concentration of Tol-Pal in a block decreases linearly with the distance from the block to the cell extremity, which allows modeling the gradual decrease of Tol-Pal with the distance from the cell extremities.

We implemented a 1-step stochastic model of expression of Tsr. Nevertheless, regarding where these proteins first appear in the cell, we account for the fact that the Tsr-Venus assembly process (namely, transcription, translation, folding, and chromophore maturation) takes  $7.0 \pm 2.5$  min (1), with most of this time being spent in the last steps. This, combined with the fast diffusion rates when not in cluster formation (8), suggests that, by the time these proteins become active, they will be virtually randomly located in any of the cytoplasm or Tol-Pal blocks. As such, the location where they first appear is randomly selected. Finally, Tsr degradation is implemented by a zero order reaction whose rate is uniform in space. Unless stated otherwise, a simulation of each model cell is conducted for 2h prior to data acquisition (as model cells are initialized without Tsr proteins).

The aspect ratio of the cell and the nucleoid size (length and width) relative to the cell size were estimated from our empirical data. The length of the model cell,  $L$ , was set to 100 blocks, which we found to provide sufficient resolution. Fig. S1 depicts model cells with large (A, C) and small (B, D) nucleoids, as well as control (A, B) and deletion mutants for Tol-Pal (C, D).

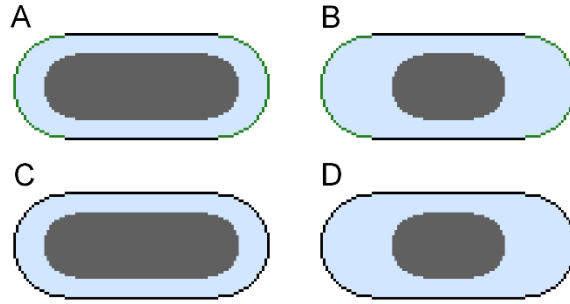

FIGURE S2. The blue area represents the cytoplasm, the grey area represents the nucleoid, the black lines represent membrane regions without Tol-Pal, and the green lines represent membrane regions with Tol-Pal (at the poles). In each model cell, the cell width is  $0.42L$  and the nucleoid width is  $0.26L$ . (A) control cell with relatively large nucleoid ( $0.76L$ ), (B)  $\Delta tolpal$  cell with relatively large nucleoid ( $0.76L$ ), (C) control cell with relatively small nucleoid ( $0.44L$ ), (D)  $\Delta tolpal$  cell with relatively small nucleoid ( $0.44L$ ). Only control cells have green lines.

Since our model is 2D, as mentioned above, we tuned the ability of each Tol-Pal block of capturing Tsr proteins as a function of its distance from the closest cell extremity, as this determines the number of Tol-Pal blocks that is expected to be at that distance in a three-dimensional (3D) model. For this, we:

1. Assume a 3D cell model, consisting of a cylinder of length  $0.58L$  and radius  $0.21L$  representing midcell and of two hemispheres of radius  $0.21L$  each (representing the poles). Tol-Pal blocks are located along the cell inner membrane at the cell poles.
2. Split the cell into  $L$  slices along the major axis, each slice being 1 block wide.
3. Convert the 3D model into a 2D model, by setting in the 2D model, at each slice, the ability of Tol-Pal block(s) of capturing Tsr clusters as a function of the amount of Tol-Pal blocks in the corresponding slice in the 3D model (Table S1).

Supplementary Table S1 lists all reactions and events in model cells. The notation of the cell blocks is the following:  $c_{cyto}$  is a cytoplasm block,  $c_{TP}$  is a Tol-Pal block,  $c_{passable}$  is a passable block (cytoplasm and Tol-Pal blocks), and  $c_{neighbour}$  is an allowed destination for a moving Tsr protein (a passable block in the 4-neighbourhood of the block the protein is presently located in). A Tsr protein located in block  $c$  is denoted ‘ $Tsr.c$ ’.

| Reaction/event                                                     | Parameter                                                                                                                              | Description and references                                                                                                                                                                                                                                                                                                                                                                                                                                                                                                                                                                                                                                                                                                            |
|--------------------------------------------------------------------|----------------------------------------------------------------------------------------------------------------------------------------|---------------------------------------------------------------------------------------------------------------------------------------------------------------------------------------------------------------------------------------------------------------------------------------------------------------------------------------------------------------------------------------------------------------------------------------------------------------------------------------------------------------------------------------------------------------------------------------------------------------------------------------------------------------------------------------------------------------------------------------|
| $\emptyset \xrightarrow{k_{tsr}} Tsr.c_{passable}$                 | $k_{tsr} = \frac{1.4}{3 \cdot N_{passable}} \text{ sec}^{-1}$                                                                          | <p>Tsr production. The rate of Tsr production in each <math>c_{passable}</math>, is:</p> $k_{tsr} = \frac{n_{burst}}{\tau_{mRNA} \cdot N_{passable}},$ <p>with the average lifetime of mRNA, <math>\tau_{mRNA}</math>, and the average number of Tsr proteins produced per burst, <math>n_{burst}</math>, being estimated from (1). <math>N_{passable}</math> is the number of <math>c_{passable}</math> blocks in the cell.</p>                                                                                                                                                                                                                                                                                                      |
| $Tsr.c_{passable} \xrightarrow{d_{tsr}} \emptyset$                 | $d_{tsr} = \frac{1}{1800} \text{ sec}^{-1}$                                                                                            | Tsr degradation reaction in each passable block (9).                                                                                                                                                                                                                                                                                                                                                                                                                                                                                                                                                                                                                                                                                  |
| $Tsr.c_{cyto} \xrightarrow{v_{cyto}} Tsr.c_{neighbour}$            | $v_{cyto} = 1 \text{ blocks/sec}$                                                                                                      | <p>Tsr motion reactions. Velocities <math>v_{cyto}</math> and <math>v_{TP}</math> were fit so that the spatial distributions of Tsr proteins for large and small nucleoids (after 2h of simulations) match the data from control cells.</p> <p><math>n_i</math> is the number of Tol-Pal blocks in slice <math>i</math> of the 2D model, <math>c_i</math> is the circumference of the corresponding slice of the 3D model, <math>\rho_i</math> is the percentage of inner membrane blocks occupied with Tol-Pal, and <math>r_i</math> is the distance (in blocks) from the slice <math>i</math> to the cell extremity along the major cell axis. When <math>r_i = 0.21L</math>, Tol-Pal is removed from the inner membrane block.</p> |
| $Tsr.c_{TP} \xrightarrow{\alpha_i \cdot v_{TP}} Tsr.c_{neighbour}$ | $v_{TP} = 1 \text{ blocks/sec}$<br>$\alpha_i = \frac{n_i}{c_i \cdot \rho_i}$<br>$\rho_i = \frac{0.21L - r_i}{0.21L}$<br>$i \in [1, L]$ |                                                                                                                                                                                                                                                                                                                                                                                                                                                                                                                                                                                                                                                                                                                                       |

TABLE S1: Reactions, parameters, and events in model cells.



## Results

### Expression of Tsr-Venus as a function of induction strength

We measured Tsr-Venus expression as a function of induction strength with a microplate fluorometer at 37 °C (Fig. S3 A). A fold change of ~110 was observed when increasing IPTG levels from 0 to 1000  $\mu\text{M ml}^{-1}$ , in agreement with a previous study (1).

Next, by live cell microscopy, with cells kept at 37 °C prior and during observation, we measured the fluorescence intensity of Tsr-Venus from individual cells (Methods) when increasing IPTG levels from 0 to 500  $\mu\text{M ml}^{-1}$ , 2 hours after induction of the target gene. The mean Tsr-Venus levels detected from the images show close agreement with the microplate fluorometer measurements (Fig. S3 B). We conclude that the quantification methods of Tsr-Venus levels from live cell imaging are accurate.

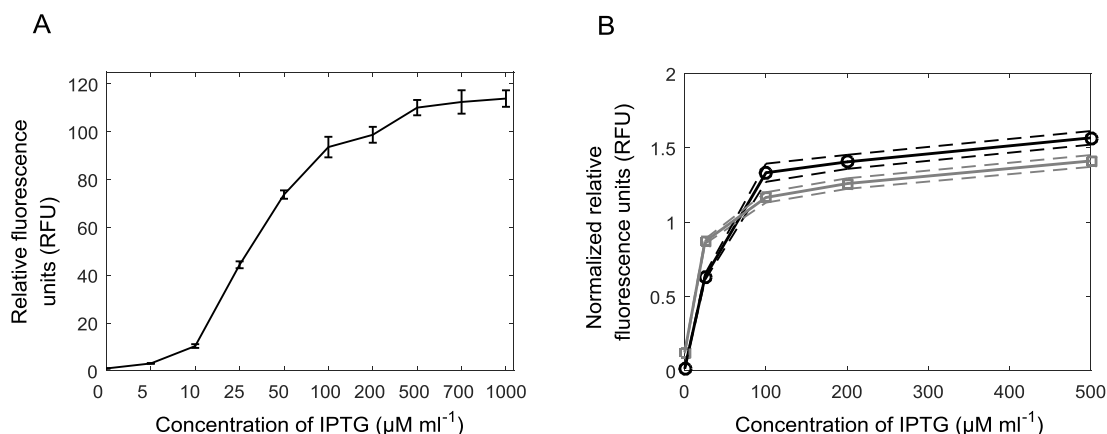

FIGURE S3. Induction curves of Tsr-Venus. (A) Mean expression levels of the target proteins (Tsr-Venus) estimated by microplate fluorometer as a function of the induction level by IPTG. Error bars are the standard deviation of three independent measurements. (B) Comparison of the induction curves (normalized by the mean, in arbitrary units) when measured by microplate fluorometer (black line) and by confocal microscopy (grey line), from live cells, 2 hours after induction by IPTG, for varying IPTG concentrations. Only the conditions observed in both the microscope and the plate reader are shown. Dashed lines are the standard deviation of the relative fluorescence units (RFU) from independent measurements, at each IPTG concentration.

## Ampicillin treated cells

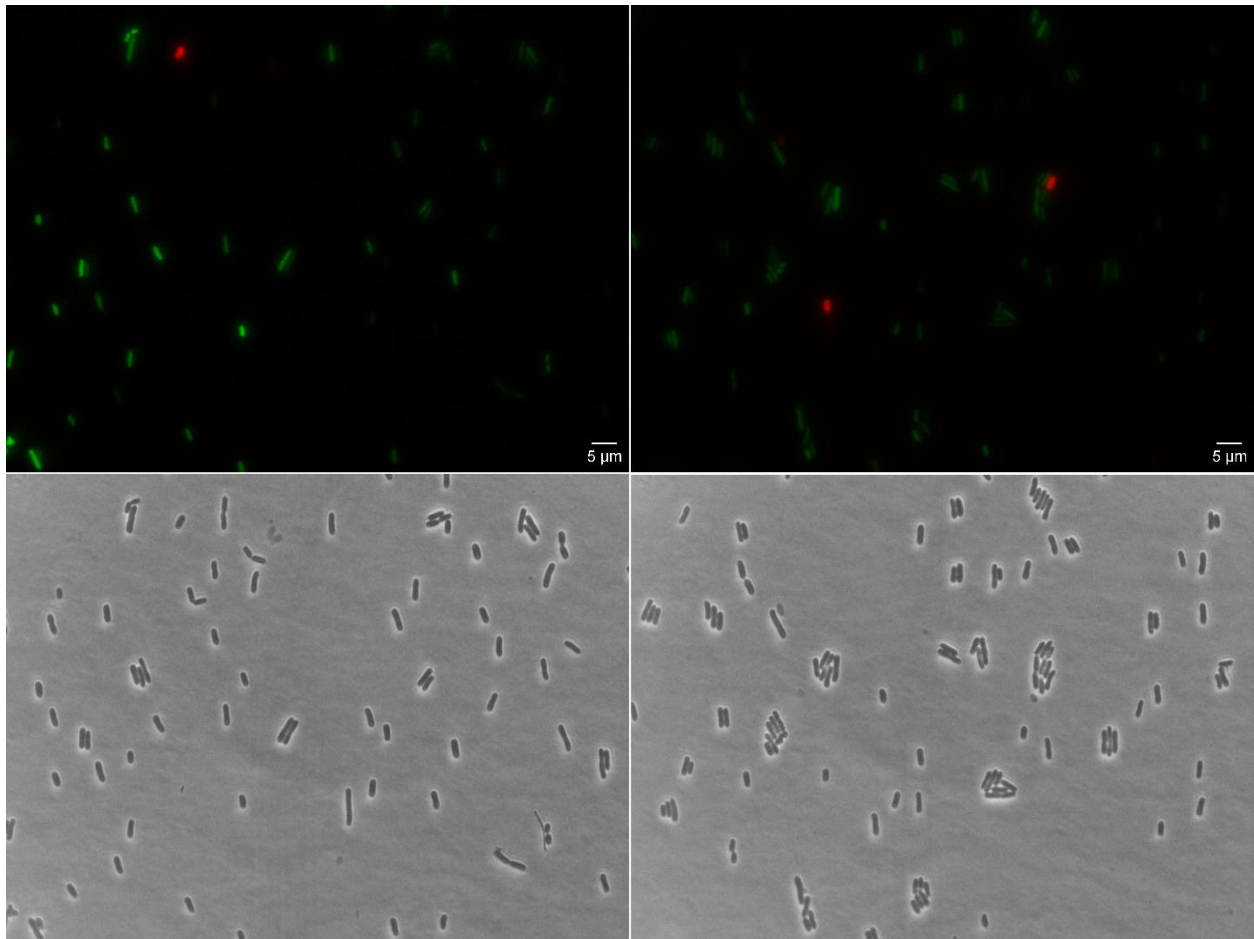

FIGURE S4. Epifluorescence microscopy images of cells treated with ampicillin (top right) and control cells (top left) subject to a BAC Live/Dead Assay. Green is indicative of viability while red is indicative of death cells. Visibly, the population subject to ampicillin contains several viable cells that were used for further analysis. In these experiments, expression of Tsr-Venus is not activated, so as to not generate 'background' fluorescence. Also shown are phase contrast images of the cells treated with ampicillin (bottom right) and control cells (bottom left).

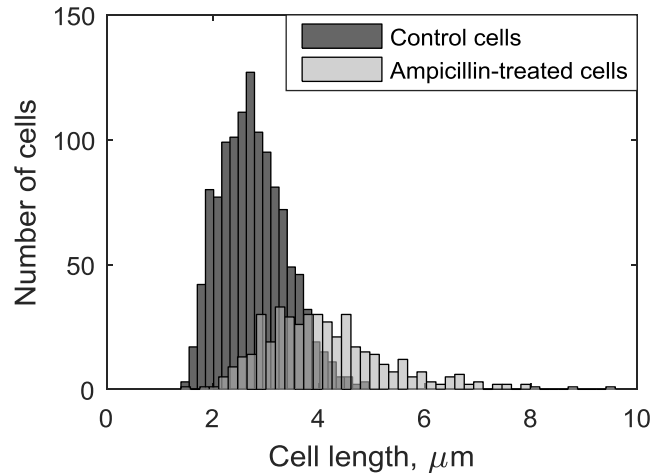

FIGURE S5. Distribution of individual cell length from 436 cells treated with ampicillin (light grey) and from 1195 control cells (dark grey). In these experiments, expression of Tsr-Venus is activated.

### Degree of symmetry of the process of segregation of Tsr clusters to the poles

We quantified the degree of symmetry of the process of segregation of Tsr clusters to the poles, relative to the poles age. For this, based on data obtained from time-lapse microscopy measurements (Methods), from the fluorescence along the major cell axis of individual cells and the definition of poles and midcell (main manuscript), we determined the fraction of cells with higher fluorescence intensity at the old pole compared to the new pole, the moment prior to dividing. Then, we tested whether the measured biases could arise from sampling from an unbiased binomial distribution.

For this test, we analyzed SX4 cells (216 cells), kept at 37 °C prior and during observation. We observed that 63% of the cells contained more Tsr at the old pole ( $p$ -value of  $0.6 \times 10^{-5}$  from a binomial test that the measured distribution can be distinguished from an unbiased binomial distribution), in agreement with previous studies (10).

This statistically significant bias could result from the presence of inherited clusters (which locate solely at old poles), rather than the process of segregation to the poles (11). To assess this, to the distribution of fluorescence along the major cell axis of each cell prior to its division, we discounted the same distribution obtained when the cell was born. As such, we obtained an approximate distribution of fluorescence of proteins produced during the cells' lifetime. From these (216 cells), we obtained the numbers of cells with larger and smaller amounts of Tsr-Venus at the old pole. Next, we calculated the same  $p$ -value as before, by comparing the empirical distribution with an unbiased binomial distribution. This  $p$ -value is larger than 0.05, from which

we conclude that the process of segregation of Tsr clusters to the poles is symmetric relative to the poles age (as reported in (10)).

From these measurements it is also possible to conclude that cell divisions introduce non-negligible biases in the numbers of Tsr-Venus between old and new poles of the cells, in agreement with (10).

### **Tsr clusters location when first detected**

We studied, from time-lapse microscopy data, the location of Tsr clusters when first detected in control cells where the induction of Tsr-Venus was made while the cells were already under observation. From Fig. S6, most clusters are already at the poles when first observed.

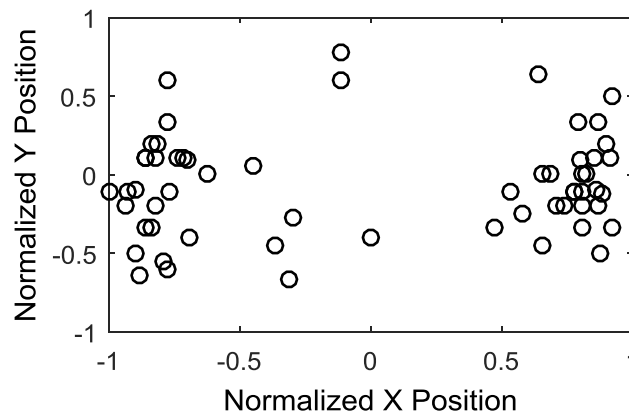

FIGURE S6. Relative positioning of Tsr-Venus clusters when first detected during a cell's lifetime (X and Y axes normalized to the interval  $[-1, 1]$ ). We arbitrarily set the 'left pole' and 'top of the cell' as the negative (-1) and the 'right pole' and 'bottom of the cell' as positive (+1), with 'left', 'right', 'top' and 'bottom' being defined by the positioning of the cell in the image.

### Tsr clusters location as a function of relative nucleoid length

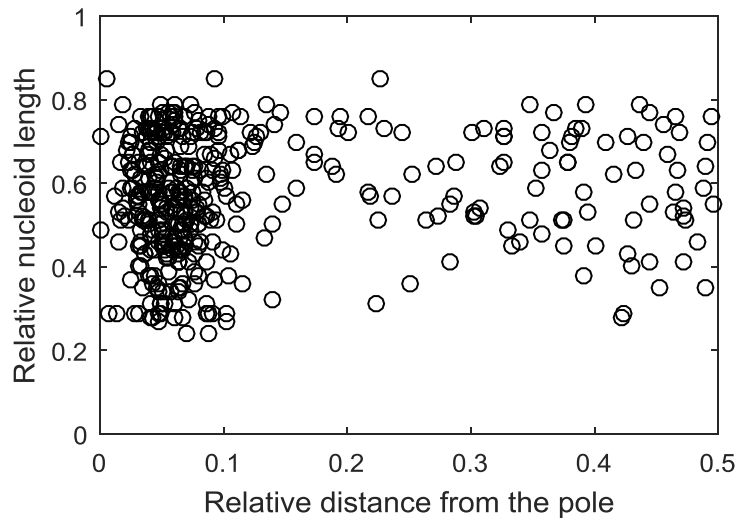

FIGURE S7: Relative nucleoid length versus relative distance of individual Tsr clusters from the closest cell extremity in WT cells.

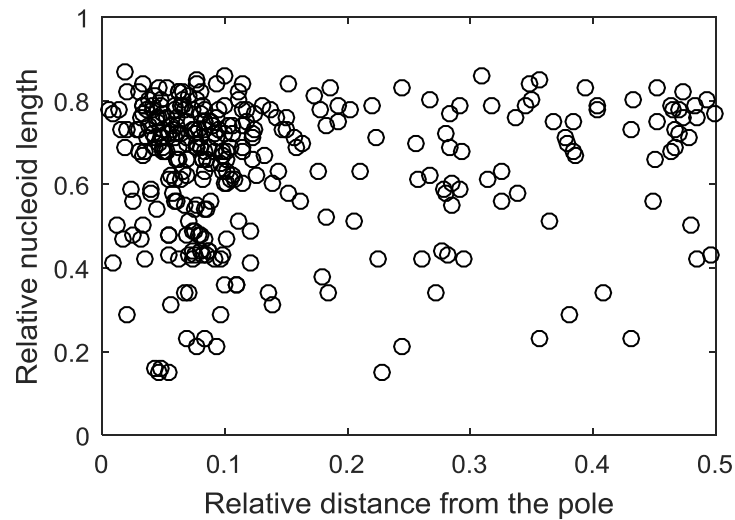

FIGURE S8: Relative nucleoid length versus relative distance of individual Tsr clusters from the closest cell extremity in  $\Delta tolpal$  cells.

## Comparison of DAPI staining and HupA-mCherry tagging

As noted in the main manuscript, Tsr-Venus distributions are identical in cells stained with DAPI and cells expressing HupA-mCherry at 37 °C (Fig. S9). As expected, they are also identically anti-correlated with the distributions of nucleoid(s) fluorescence (Pearson correlation equaled -0.87). Finally, the p-value of the *t*-test of statistical significance assuming that the data are uncorrelated was smaller than  $10^{-4}$ , i.e. the anti-correlation is statistically significant.

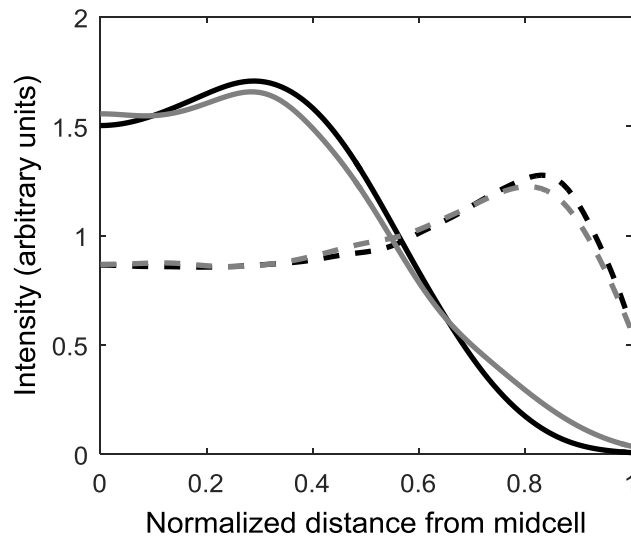

FIGURE S9. Kernel density estimates (KDEs) of the spatial distributions of the background-subtracted fluorescence of cells with the nucleoids stained by DAPI (black lines, 125 cells) and by HupA-mCherry (grey lines, 58 cells). Also shown (dashed lines) are the KDEs of fluorescence intensities (arbitrary units) of Tsr-Venus along the major cell axis (bandwidths 0.05) of the same cells.

**Correlations between Tsr clusters spatial distributions as estimated from the empirical data**

| <b>Strain,</b>         | <b>WT,</b>           | <b>WT,</b>           | <b><i>Δtolpal</i>,</b> |
|------------------------|----------------------|----------------------|------------------------|
| <b>Nucleoid length</b> | <b>large</b>         | <b>small</b>         | <b>large</b>           |
| <b><i>Δtolpal</i>,</b> | $p = 0.05$           | $p = 0.17$           | $p = 0.75$             |
| <b>small</b>           |                      |                      |                        |
| <b><i>Δtolpal</i>,</b> | $p < 0.01$           | $p < 0.01$           |                        |
| <b>large</b>           | $r = 0.75$           | $r = 0.69$           |                        |
|                        | $r \in [0.33, 0.92]$ | $r \in [0.21, 0.90]$ |                        |
| <b>WT,</b>             | $p < 0.01$           |                      |                        |
| <b>small</b>           | $r = 0.61$           |                      |                        |
|                        | $r \in [0.08, 0.87]$ |                      |                        |

TABLE S2  $p$ -values of the Pearson correlation between Tsr clusters spatial distributions in WT and *Δtolpal* cells with relatively large (occupying  $\geq 65\%$  of the cell length) and small (occupying  $\leq 35\%$  of the cell length) nucleoids. When the correlation is significant ( $p < 0.01$ ), the Pearson correlation value  $r$ , and the 95% CI of  $r$  are also shown.

**Correlations between Tsr clusters spatial distributions in the stochastic models of nucleoid exclusion of Tsr clusters from midcell**

| <b>Strain,</b>         | <b>WT,</b>           | <b>WT,</b>           | <b><i>Δtolpal</i>,</b> |
|------------------------|----------------------|----------------------|------------------------|
| <b>Nucleoid length</b> | <b>large</b>         | <b>small</b>         | <b>large</b>           |
| <b><i>Δtolpal</i>,</b> | $p = 0.19$           | $p < 0.01$           | $p < 0.01$             |
| <b>small</b>           |                      | $r = 0.52$           | $r = 0.44$             |
|                        |                      | $r \in [0.29, 0.70]$ | $r \in [0.18, 0.64]$   |
| <b><i>Δtolpal</i>,</b> | $p \ll 0.01$         | $p \ll 0.01$         |                        |
| <b>large</b>           | $r = 0.82$           | $r = 0.80$           |                        |
|                        | $r \in [0.71, 0.90]$ | $r \in [0.67, 0.88]$ |                        |
| <b>WT,</b>             | $p \ll 0.01$         |                      |                        |
| <b>small</b>           | $r = 0.93$           |                      |                        |
|                        | $r \in [0.87, 0.96]$ |                      |                        |

TABLE S3 *In silico* model. *P*-values of the Pearson correlation between Tsr clusters spatial distributions in WT and *Δtolpal* cells with relatively large and small nucleoids. When the correlation is significant ( $p < 0.05$ ), the Pearson correlation value  $r$ , and the 95% CI of  $r$  are also shown. The data from each condition is from 1000 cells.



## SUPPORTING REFERENCES

1. Yu, J., J. Xiao, X. Ren, K. Lao, and X.S. Xie. 2006. Probing gene expression in live cells, one protein molecule at a time. *Science*. 311: 1600–3.
2. Oh, D., Y. Yu, H. Lee, B.L. Wanner, and K. Ritchie. 2014. Dynamics of the serine chemoreceptor in the escherichia coli inner membrane: A high-speed single-molecule tracking study. *Biophys. J.* 106: 145–153.
3. Koch, A.L., and J. V. Holtje. 1995. A physical basis for the precise location of the division site of rod-shaped bacteria: The Central Stress Model. *Microbiology*. 141: 3171–3180.
4. Helgesen, E., S. Fossum-Raunehaug, and K. Skarstad. 2016. Lack of the H-NS protein results in extended and aberrantly positioned DNA during chromosome replication and segregation in *Escherichia coli*. *J. Bacteriol.* 198: 1305–1316.
5. Fisher, J.K., A. Bourniquel, G. Witz, B. Weiner, M. Prentiss, and N. Kleckner. 2013. Four-Dimensional Imaging of *E. coli* Nucleoid Organization and Dynamics in Living Cells. *Cell*. 153: 882–895.
6. Zimmerman, S.B. 2006. Shape and compaction of *Escherichia coli* nucleoids. *J. Struct. Biol.* 156: 255–61.
7. Fritsche, M., S. Li, D.W. Heermann, and P.A. Wiggins. 2012. A model for *Escherichia coli* chromosome packaging supports transcription factor-induced DNA domain formation. *Nucleic Acids Res.* 40: 972–980.
8. Elowitz, M.B., M.G. Surette, P. Wolf, J.B. Stock, and S. Leibler. 1999. Protein Mobility in the Cytoplasm of. 181: 197–203.
9. Taniguchi, Y., P.J. Choi, G.W. Li, H. Chen, M. Babu, J. Hearn, A. Emili, and X.S. Xie. 2010. Quantifying *E. coli* Proteome and Transcriptome with Single-Molecule Sensitivity in Single Cells. *Sci. (New York, NY)*. 329: 533–538.
10. Ping, L., B. Weiner, and N. Kleckner. 2008. Tsr-GFP accumulates linearly with time at cell poles, and can be used to differentiate “old” versus “new” poles, in *Escherichia coli*. *Mol. Microbiol.* 69: 1427–38.
11. Gupta, A., J. Lloyd-Price, R. Neeli-Venkata, S.M.D. Oliveira, and A.S. Ribeiro. 2014. In vivo kinetics of segregation and polar retention of MS2-GFP-RNA complexes in *Escherichia coli*. *Biophys. J.* 106: 1928–37.
